# Supplementary material for: Mussel fouling in chlorinated cooling systems
Source: Royal Society of Chemistry journal article supplement (doi:10.1039/d3ay01803b), 1970-09-26
Supplement: d3ay01803b1.pdf [file d3ay01803b1.pdf]

Supplementary materials:

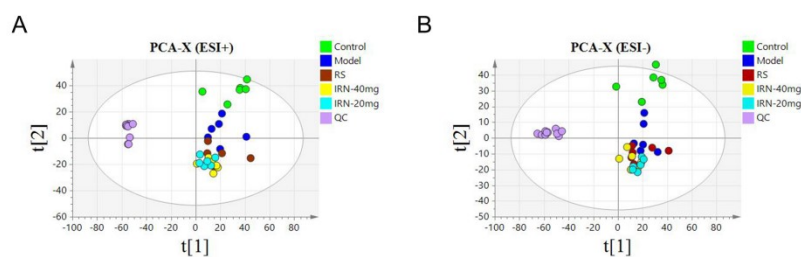

Fig. S1. PCA statistical analysis of serum data. A: PCA score plots for control, model, RS, IRN-20mg/kg, IRN-40mg/kg and QC groups based on LC-MS data in the positive mode. B: PCA score plots for control, model, RS, IRN-20mg/kg, IRN-40mg/kg and QC groups based on LC-MS data in the negative mode.

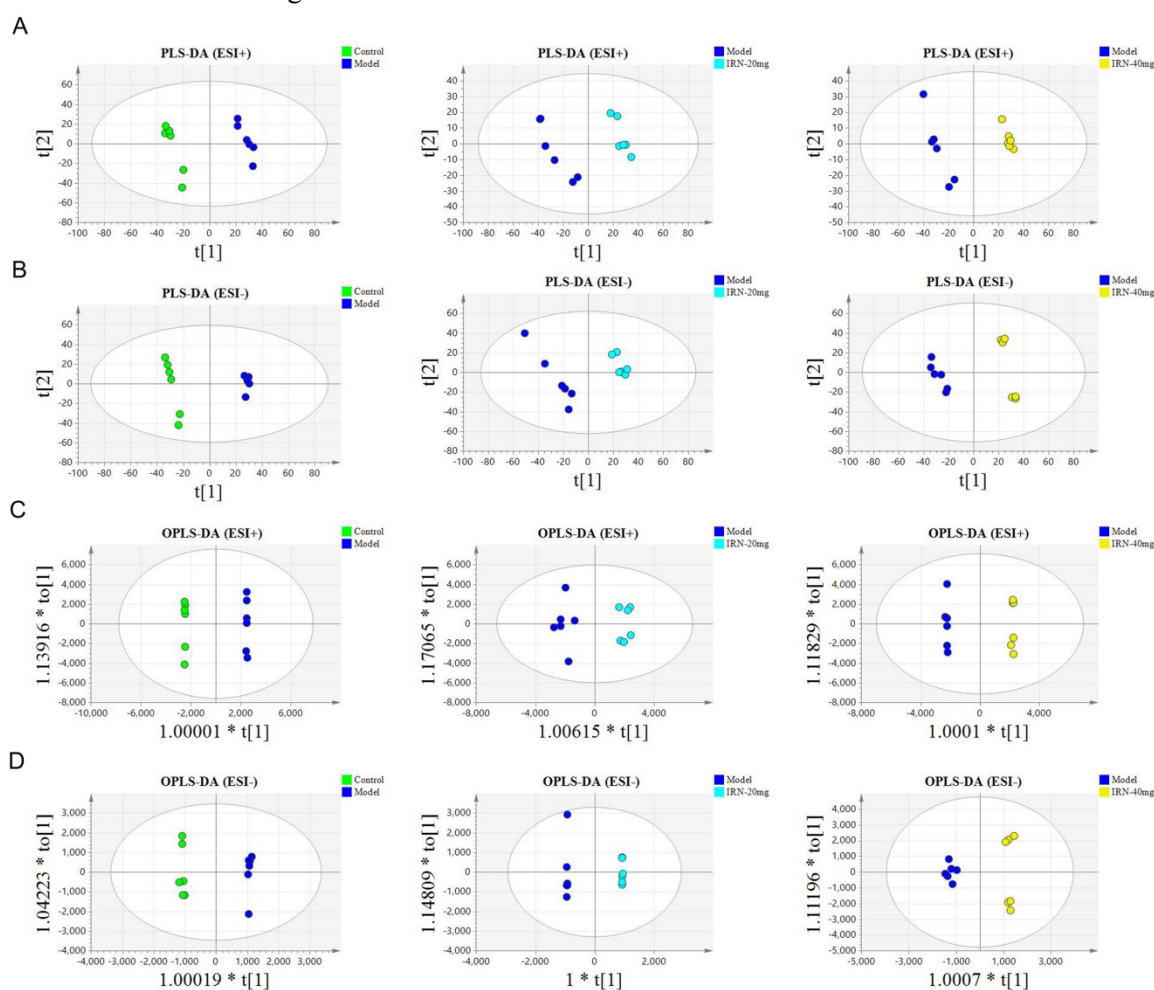

Fig S2. PLS-DA and OPLS-DA score plot of the serum data. A: PLS-DA score plot in positive ion mode. B: PLS-DA score plot in negative ion mode. C: OPLS-DA score plot in positive ion mode. B: OPLS-DA score plot in negative ion mode.

Table 1. Identified potential biomarkers between the control animal group and model animal group in both positive (+) and negative (-) ion modes.

| Biomarkers                                  | [M±X] <sup>+/-</sup> | Chemical formula                                              | Model/Control |        |         |    |
|---------------------------------------------|----------------------|---------------------------------------------------------------|---------------|--------|---------|----|
|                                             |                      |                                                               | VIP           | P      | FC      | CT |
| 4-Hepteneoylglycine                         | 184.09673            | C <sub>9</sub> H <sub>15</sub> NO <sub>3</sub>                | 1.4926        | 0.0002 | 2.4327  | ↑  |
| (2Z)-5-hydroxydec-2-enoic acid              | 185.11731            | C <sub>10</sub> H <sub>18</sub> O <sub>3</sub>                | 1.215         | 0.0084 | -2.2849 | ↓  |
| 3-Hydroxysebacic acid                       | 217.10802            | C <sub>10</sub> H <sub>18</sub> O <sub>5</sub>                | 1.0313        | 0.0046 | -2.5101 | ↓  |
| Methyl 4-chloro-1H-indole-3-acetate         | 222.0324             | C <sub>11</sub> H <sub>10</sub> ClNO <sub>2</sub>             | 1.2528        | 0.001  | -3.7776 | ↓  |
| Galactosylglycerol                          | 253.0926             | C <sub>9</sub> H <sub>18</sub> O <sub>8</sub>                 | 1.2415        | 0.0000 | 2.3506  | ↑  |
| (2E,4Z)-tetradeca-2,4-dienedioic acid       | 253.14421            | C <sub>14</sub> H <sub>22</sub> O <sub>4</sub>                | 1.4826        | 0.0011 | -4.3766 | ↓  |
| 5-Acetoxydihydrotheaespirane                | 253.18126            | C <sub>15</sub> H <sub>26</sub> O <sub>3</sub>                | 1.2266        | 0.0028 | -2.297  | ↓  |
| Dibutyl adipate                             | 257.17563            | C <sub>14</sub> H <sub>26</sub> O <sub>4</sub>                | 1.1111        | 0.001  | -5.449  | ↓  |
| Acoric acid                                 | 267.16025            | C <sub>15</sub> H <sub>24</sub> O <sub>4</sub>                | 1.1604        | 0.0004 | -6.6071 | ↓  |
| 9-HOTE                                      | 293.2124             | C <sub>18</sub> H <sub>30</sub> O <sub>3</sub>                | 1.1449        | 0.0001 | -2.232  | ↓  |
| 13-HODE                                     | 295.22803            | C <sub>18</sub> H <sub>32</sub> O <sub>3</sub>                | 1.1903        | 0.0001 | -2.5723 | ↓  |
| Icosa-2,4,6,8,10-pentaenoic acid            | 301.218              | C <sub>20</sub> H <sub>30</sub> O <sub>2</sub>                | 1.084         | 0.0000 | -3.3066 | ↓  |
| 12,13-DHOME                                 | 313.23914            | C <sub>18</sub> H <sub>34</sub> O <sub>4</sub>                | 1.064         | 0.0001 | -2.4426 | ↓  |
| 12-KETE                                     | 317.21265            | C <sub>20</sub> H <sub>30</sub> O <sub>3</sub>                | 1.1378        | 0.0002 | -2.568  | ↓  |
| 8-HDoHE                                     | 343.22797            | C <sub>22</sub> H <sub>32</sub> O <sub>3</sub>                | 1.1504        | 0.0002 | -2.5679 | ↓  |
| Siderol                                     | 345.24338            | C <sub>22</sub> H <sub>34</sub> O <sub>3</sub>                | 1.1647        | 0.0028 | -2.1641 | ↓  |
| Blumenol C glucoside                        | 371.20737            | C <sub>19</sub> H <sub>32</sub> O <sub>7</sub>                | 1.1689        | 0.0002 | -3.8063 | ↓  |
| N-Oleoyl phenylalanine                      | 428.31665            | C <sub>27</sub> H <sub>43</sub> NO <sub>3</sub>               | 1.1221        | 0.0325 | 7.3276  | ↑  |
| LysoPE(P-18:0/0:0)                          | 464.31345            | C <sub>23</sub> H <sub>48</sub> NO <sub>6</sub> P             | 1.1499        | 0.0001 | 2.0051  | ↑  |
| LysoPC(0:0/16:0)                            | 494.32593            | C <sub>24</sub> H <sub>50</sub> NO <sub>7</sub> P             | 1.2757        | 0.0000 | -2.5816 | ↓  |
| Taurochenodesoxycholic acid                 | 498.28925            | C <sub>26</sub> H <sub>45</sub> NO <sub>6</sub> S             | 1.074         | 0.0011 | 2.1914  | ↑  |
| LysoPE(22:6(4Z,7Z,10Z,13Z,16Z,19Z)/0:0)     | 524.2783             | C <sub>27</sub> H <sub>44</sub> NO <sub>7</sub> P             | 1.0351        | 0.0000 | -2.0565 | ↓  |
| LysoPE(22:5(7Z,10Z,13Z,16Z,19Z)/0:0)        | 526.29474            | C <sub>27</sub> H <sub>46</sub> NO <sub>7</sub> P             | 1.211         | 0.0000 | -2.5091 | ↓  |
| PC(18:1(12Z)-2OH(9,10)/15:0)                | 776.5592             | C <sub>45</sub> H <sub>80</sub> NO <sub>7</sub> P             | 1.0281        | 0.0049 | 2.1755  | ↑  |
| Indoleacetaldehyde                          | 160.07585            | C <sub>10</sub> H <sub>9</sub> NO                             | 1.1903        | 0.0000 | -2.1228 | ↓  |
| N-Hydroxyl-tryptamine                       | 177.1023             | C <sub>10</sub> H <sub>12</sub> N <sub>2</sub> O              | 1.2296        | 0.0000 | -2.0375 | ↓  |
| Diphenyl sulfide                            | 187.05377            | C <sub>12</sub> H <sub>10</sub> S                             | 1.2969        | 0.0000 | 2.1235  | ↓  |
| S-nirvanol                                  | 205.09721            | C <sub>11</sub> H <sub>12</sub> N <sub>2</sub> O <sub>2</sub> | 1.2509        | 0.0000 | -2.0293 | ↓  |
| 2-Phenylethyl hexanoate                     | 221.15352            | C <sub>14</sub> H <sub>20</sub> O <sub>2</sub>                | 1.1662        | 0.0000 | 3.8974  | ↑  |
| 3,4-Dimethyl-5-pentyl-2-furanpropanoic acid | 239.16441            | C <sub>14</sub> H <sub>22</sub> O <sub>3</sub>                | 1.3571        | 0.0000 | 4.5111  | ↑  |
| 2-hydroxytetradeca-4,6-dienoic acid         | 241.17783            | C <sub>14</sub> H <sub>24</sub> O <sub>3</sub>                | 1.1897        | 0.001  | -4.3718 | ↓  |
| Vidarabine                                  | 268.10394            | C <sub>10</sub> H <sub>13</sub> N <sub>5</sub> O <sub>4</sub> | 1.4129        | 0.0249 | -7.3688 | ↓  |
| all-trans-Retinoic acid                     | 301.2159             | C <sub>20</sub> H <sub>28</sub> O <sub>2</sub>                | 1.2395        | 0.000  | -3.1031 | ↓  |
| Docosahexaenoic acid(DHA)                   | 329.24765            | C <sub>22</sub> H <sub>32</sub> O <sub>2</sub>                | 1.0449        | 0.0004 | -2.058  | ↓  |

|                                                      |           |                                                   |        |        |          |   |
|------------------------------------------------------|-----------|---------------------------------------------------|--------|--------|----------|---|
| 3, 5-Tetradecadiencarnitine                          | 368.27948 | C <sub>21</sub> H <sub>37</sub> NO <sub>4</sub>   | 1.0624 | 0.0003 | -2.1298  | ↓ |
| Adrenoyl ethanolamide                                | 376.32166 | C <sub>24</sub> H <sub>41</sub> NO <sub>2</sub>   | 1.0334 | 0.0071 | -2.619   | ↓ |
| Persicachrome                                        | 385.27475 | C <sub>25</sub> H <sub>36</sub> O <sub>3</sub>    | 1.1432 | 0.0000 | -3.78    | ↓ |
| (7Z,10Z)-<br>Hexadecadienoylcarnitine                | 396.3107  | C <sub>23</sub> H <sub>41</sub> NO <sub>4</sub>   | 1.3817 | 0.0001 | -2.0546  | ↓ |
| Heptadecanoyl carnitine                              | 414.358   | C <sub>24</sub> H <sub>47</sub> NO <sub>4</sub>   | 1.2527 | 0.0000 | 2.5583   | ↑ |
| Vaccenyl carnitine                                   | 426.35812 | C <sub>25</sub> H <sub>47</sub> NO <sub>4</sub>   | 1.7456 | 0.0000 | 2.775    | ↑ |
| Stearoylcarnitine                                    | 428.3734  | C <sub>25</sub> H <sub>49</sub> NO <sub>4</sub>   | 1.6698 | 0.0000 | 3.3237   | ↑ |
| Arachidyl carnitine                                  | 456.4053  | C <sub>27</sub> H <sub>53</sub> NO <sub>4</sub>   | 1.2024 | 0.0000 | 3.9902   | ↑ |
| LysoPE(20:5(5Z,8Z,11Z,14Z,17Z)/0:0)                  | 500.2769  | C <sub>25</sub> H <sub>42</sub> NO <sub>7</sub> P | 1.2186 | 0.0000 | -2.4278  | ↓ |
| LysoPC(P-18:0/0:0)                                   | 508.37665 | C <sub>26</sub> H <sub>54</sub> NO <sub>6</sub> P | 1.5581 | 0.0000 | 3.5131   | ↑ |
| LysoPC(O-18:0/0:0)                                   | 510.39175 | C <sub>26</sub> H <sub>56</sub> NO <sub>6</sub> P | 1.2237 | 0.0000 | 3.5646   | ↑ |
| LysoPE(22:6(4Z,7Z,10Z,13Z,16Z,19Z)/0:0)              | 526.29254 | C <sub>27</sub> H <sub>44</sub> NO <sub>7</sub> P | 1.1346 | 0.0000 | -2.6473  | ↓ |
| LysoPE(22:0/0:0)                                     | 538.38763 | C <sub>27</sub> H <sub>56</sub> NO <sub>7</sub> P | 1.0763 | 0.0000 | -2.2849  | ↓ |
| LysoPC(20:3(8Z,11Z,14Z)/0:0)                         | 546.35516 | C <sub>28</sub> H <sub>52</sub> NO <sub>7</sub> P | 1.317  | 0.0000 | 2.1834   | ↑ |
| LysoPC(22:5(4Z,7Z,10Z,13Z,16Z)/0:0)                  | 570.35657 | C <sub>30</sub> H <sub>52</sub> NO <sub>7</sub> P | 1.3492 | 0.0003 | 2.3171   | ↑ |
| LysoPC(22:4(7Z,10Z,13Z,16Z)/0:0)                     | 572.371   | C <sub>30</sub> H <sub>54</sub> NO <sub>7</sub> P | 1.0413 | 0.0001 | 2.1997   | ↑ |
| Cer(d18:0/20:0)                                      | 596.5973  | C <sub>38</sub> H <sub>77</sub> NO <sub>3</sub>   | 1.1485 | 0.0114 | 72.9991  | ↑ |
| PC(18:2(9Z,12Z)/14:0)                                | 730.53894 | C <sub>40</sub> H <sub>76</sub> NO <sub>8</sub> P | 1.7583 | 0.0068 | 51.7614  | ↑ |
| PC(18:2(9Z,12Z)/15:0)                                | 744.554   | C <sub>41</sub> H <sub>78</sub> NO <sub>8</sub> P | 1.5304 | 0.0001 | 113.0833 | ↑ |
| PC(22:5(7Z,10Z,13Z,16Z,19Z)/14:0)                    | 780.5541  | C <sub>44</sub> H <sub>78</sub> NO <sub>8</sub> P | 1.5597 | 0.0014 | 64.6053  | ↑ |
| PC(20:4(8Z,11Z,14Z,17Z)/16:0)                        | 782.56836 | C <sub>44</sub> H <sub>80</sub> NO <sub>8</sub> P | 1.0624 | 0.0007 | 60.1143  | ↑ |
| PC(22:6(4Z,7Z,10Z,13Z,16Z,19Z)/18:3(9Z,12Z,15Z))     | 828.55145 | C <sub>48</sub> H <sub>78</sub> NO <sub>8</sub> P | 1.1074 | 0.0006 | 89.3566  | ↑ |
| PC(22:6(4Z,7Z,10Z,13Z,16Z,19Z)/18:2(9Z,12Z))         | 830.5686  | C <sub>48</sub> H <sub>80</sub> NO <sub>8</sub> P | 1.1884 | 0.007  | 24.8392  | ↑ |
| PC(22:6(4Z,7Z,10Z,13Z,16Z,19Z)/20:4(8Z,11Z,14Z,17Z)) | 854.57025 | C <sub>50</sub> H <sub>80</sub> NO <sub>8</sub> P | 1.5231 | 0.0034 | 30.4044  | ↑ |

Table 2 Detailed information on metabolic pathways.

| Pathway Name                    | Match Status | P         | -log(p) | FDR     | Impact  |
|---------------------------------|--------------|-----------|---------|---------|---------|
| Glycerophospholipid metabolism  | 2/36         | 0.0016426 | 2.7845  | 0.13798 | 0.11182 |
| Linoleic acid metabolism        | 1/5          | 0.0099337 | 2.0029  | 0.8245  | 0.0     |
| alpha-Linolenic acid metabolism | 1/13         | 0.02569   | 1.5902  | 1.0     | 0.0     |

---

|                                |      |          |        |     |         |
|--------------------------------|------|----------|--------|-----|---------|
| Arachidonic acid metabolism    | 1/36 | 0.070058 | 1.1545 | 1.0 | 0.0     |
| Primary bile acid biosynthesis | 1/46 | 0.08892  | 1.051  | 1.0 | 0.02285 |

---
